# Supplementary material
Source: MDPI journal article supplement (https://www.mdpi.com/2071-1050/10/2/351)
Supplement: s1 [file s1]

**Objective of the research questionnaire survey:** meaning of the eco-labels and Life Cycle Assessment for experts involved in construction industry and manufacture of paints. Analysis of sustainability for indoor wall paints and coatings for the PhD thesis at TU Bergakademie Freiberg, Germany.

**Location:**

**Date:**

| I. Assessment of construction products<br>Please give your answer for the following questions with a Likert-scale from 1 to 6, where 1 = "highly important"; 2 = "very important"; 3 = "quite important"; 4 = "less important"; 5 = "not important"; 6 = "not specified" (shortly, "NS") | Please give your assessment/answer |                                        |   |                                              |   |                          |
|------------------------------------------------------------------------------------------------------------------------------------------------------------------------------------------------------------------------------------------------------------------------------------------|------------------------------------|----------------------------------------|---|----------------------------------------------|---|--------------------------|
|                                                                                                                                                                                                                                                                                          | 1                                  | 2                                      | 3 | 4                                            | 5 | 6                        |
| 1. How important for you is that construction products have eco-labels?                                                                                                                                                                                                                  | 1                                  | 2                                      | 3 | 4                                            | 5 | 6                        |
| 2. Where can average consumers buy your products?                                                                                                                                                                                                                                        | <input type="radio"/> Online       | <input type="radio"/> In special store |   | <input type="radio"/> In construction market |   | <input type="radio"/> NS |
| 3. How important for you is that Material Safety Data Sheets (MSDS) are available with your products?                                                                                                                                                                                    | 1                                  | 2                                      | 3 | 4                                            | 5 | 6                        |
| 4. Do your customers ask for MSDS in the store?                                                                                                                                                                                                                                          | <input type="radio"/> yes          |                                        |   | <input type="radio"/> no                     |   |                          |
| 5. If not, may I ask you why?                                                                                                                                                                                                                                                            |                                    |                                        |   |                                              |   |                          |
| 6. Are you familiar with the Life Cycle Assessment (LCA)?                                                                                                                                                                                                                                | <input type="radio"/> yes          |                                        |   | <input type="radio"/> no                     |   |                          |
| 7. Is making LCA accessible for end-users important for you?                                                                                                                                                                                                                             | <input type="radio"/> yes          |                                        |   | <input type="radio"/> no                     |   |                          |
| 8. If not, may I ask you why?                                                                                                                                                                                                                                                            |                                    |                                        |   |                                              |   |                          |

| II. Assessment of environmental and health issues with respect to indoor paints and coatings<br>Please give your answer for the following questions with a Likert-scale from 1 to 6, where 1 = "highly important"; 2 = "very important"; 3 = "quite important"; 4 = "less important"; 5 = "not important"; 6 = "not specified" (shortly, "NS") | Please give your assessment/answer |   |   |                          |   |   |
|------------------------------------------------------------------------------------------------------------------------------------------------------------------------------------------------------------------------------------------------------------------------------------------------------------------------------------------------|------------------------------------|---|---|--------------------------|---|---|
|                                                                                                                                                                                                                                                                                                                                                | 1                                  | 2 | 3 | 4                        | 5 | 6 |
| 9. Is it important to protect ground water?                                                                                                                                                                                                                                                                                                    | 1                                  | 2 | 3 | 4                        | 5 | 6 |
| 10. How important for you is keeping the Indoor Air Quality standards?                                                                                                                                                                                                                                                                         | 1                                  | 2 | 3 | 4                        | 5 | 6 |
| 11. How sensitive are you personally to odours of indoor paints?                                                                                                                                                                                                                                                                               | 1                                  | 2 | 3 | 4                        | 5 | 6 |
| 12. Do your customers ask about environmental issues before buying your product?                                                                                                                                                                                                                                                               | <input type="radio"/> yes          |   |   | <input type="radio"/> no |   |   |
| 13. If not, may I ask you why?                                                                                                                                                                                                                                                                                                                 |                                    |   |   |                          |   |   |
| 14. Is Blue Angel eco-label on the paint packaging important for you?                                                                                                                                                                                                                                                                          | <input type="radio"/> yes          |   |   | <input type="radio"/> no |   |   |
| 15. If not, may I ask you why?                                                                                                                                                                                                                                                                                                                 |                                    |   |   |                          |   |   |
| 16. Are you aware of evaporation of hazardous emissions through paints?                                                                                                                                                                                                                                                                        | <input type="radio"/> yes          |   |   | <input type="radio"/> no |   |   |
| 17. How important for you is using solvent-free paints?                                                                                                                                                                                                                                                                                        | 1                                  | 2 | 3 | 4                        | 5 | 6 |
| 18. How important for you is using indoor paints that are not harmful for respiratory tract diseases?                                                                                                                                                                                                                                          | 1                                  | 2 | 3 | 4                        | 5 | 6 |

|                                                                                                                   |                           |                          |                          |
|-------------------------------------------------------------------------------------------------------------------|---------------------------|--------------------------|--------------------------|
| 19. Have you or your colleague ever had any complaints to the bad air quality caused through emissions of paints? | <input type="radio"/> yes | <input type="radio"/> no | <input type="radio"/> NS |
|-------------------------------------------------------------------------------------------------------------------|---------------------------|--------------------------|--------------------------|

### III. Personal Information (optional)

|                                                                                                                                                                                                                         |                                                                     |
|-------------------------------------------------------------------------------------------------------------------------------------------------------------------------------------------------------------------------|---------------------------------------------------------------------|
| <b>Gender:</b> <input type="radio"/> female <input type="radio"/> male <input type="radio"/> NS                                                                                                                         | <b>Zip-code:</b>                                                    |
| <b>Age:</b> <input type="radio"/> <20 <input type="radio"/> 20-35 <input type="radio"/> 36-50 <input type="radio"/> 51-65 <input type="radio"/> >65                                                                     | <b>Children:</b> <input type="radio"/> yes <input type="radio"/> no |
| <b>Level of education:</b> <input type="radio"/> Graduate degree <input type="radio"/> High school degree <input type="radio"/> Professional education <input type="radio"/> University degree <input type="radio"/> NS |                                                                     |
| <b>Job category:</b>                                                                                                                                                                                                    |                                                                     |
