# Supplementary material
Source: MDPI journal article supplement (https://www.mdpi.com/2071-1050/10/2/351)
Supplement: s1 [file s1]

**Objective of the research questionnaire survey:** meaning of the health factors (allergies, asthma, etc.) and sustainability for end-users. Analysis of sustainability for indoor wall paints and coatings for the PhD thesis at TU Bergakademie Freiberg, Germany.

**Location:**

**Date:**

| I. Assessment of construction products<br>Please give your answer for the following questions with a Likert-scale from 1 to 6, where 1 = "highly important"; 2 = "very important"; 3 = "quite important"; 4 = "less important"; 5 = "not important"; 6 = "not specified" (shortly, "NS") | Please give your assessment/answer |                                        |   |                                              |   |                          |
|------------------------------------------------------------------------------------------------------------------------------------------------------------------------------------------------------------------------------------------------------------------------------------------|------------------------------------|----------------------------------------|---|----------------------------------------------|---|--------------------------|
|                                                                                                                                                                                                                                                                                          | 1                                  | 2                                      | 3 | 4                                            | 5 | 6                        |
| 1. How important for you is that construction products have eco-labels?                                                                                                                                                                                                                  | 1                                  | 2                                      | 3 | 4                                            | 5 | 6                        |
| 2. Where do you usually buy construction products?                                                                                                                                                                                                                                       | <input type="radio"/> Online       | <input type="radio"/> In special store |   | <input type="radio"/> In construction market |   | <input type="radio"/> NS |
| 3. How important for you is that Material Safety Data Sheets (MSDS) are available with the paint products?                                                                                                                                                                               | 1                                  | 2                                      | 3 | 4                                            | 5 | 6                        |
| 4. Do you read MSDSs online or ask for MSDSs at the paint counter?                                                                                                                                                                                                                       | <input type="radio"/> yes, _____   |                                        |   | <input type="radio"/> no                     |   |                          |
| 5. If not, may I ask you why?                                                                                                                                                                                                                                                            |                                    |                                        |   |                                              |   |                          |
| 6. Are you familiar with the Life Cycle Assessment (LCA)?                                                                                                                                                                                                                                | <input type="radio"/> yes          |                                        |   | <input type="radio"/> no                     |   |                          |
| 7. Is making LCA accessible for end-users important for you?                                                                                                                                                                                                                             | <input type="radio"/> yes          |                                        |   | <input type="radio"/> no                     |   |                          |
| 8. If not, may I ask you why?                                                                                                                                                                                                                                                            |                                    |                                        |   |                                              |   |                          |

| II. Assessment of environmental and health issues with respect to indoor paints and coatings<br>Please give your answer for the following questions with a Likert-scale from 1 to 6, where 1 = "highly important"; 2 = "very important"; 3 = "quite important"; 4 = "less important"; 5 = "not important"; 6 = "not specified" (shortly, "NS") | Please give your assessment/answer |   |   |                          |   |   |
|------------------------------------------------------------------------------------------------------------------------------------------------------------------------------------------------------------------------------------------------------------------------------------------------------------------------------------------------|------------------------------------|---|---|--------------------------|---|---|
|                                                                                                                                                                                                                                                                                                                                                | 1                                  | 2 | 3 | 4                        | 5 | 6 |
| 9. Is it important to protect ground water?                                                                                                                                                                                                                                                                                                    | 1                                  | 2 | 3 | 4                        | 5 | 6 |
| 10. How important for you is keeping the Indoor Air Quality standards?                                                                                                                                                                                                                                                                         | 1                                  | 2 | 3 | 4                        | 5 | 6 |
| 11. How sensitive are you to odours of indoor paints?                                                                                                                                                                                                                                                                                          | 1                                  | 2 | 3 | 4                        | 5 | 6 |
| 12. Do you ask about environmental issues before buying a product?                                                                                                                                                                                                                                                                             | <input type="radio"/> yes          |   |   | <input type="radio"/> no |   |   |
| 13. If not, may I ask you why?                                                                                                                                                                                                                                                                                                                 |                                    |   |   |                          |   |   |
| 14. Is Blue Angel eco-label on the paint packaging important for you?                                                                                                                                                                                                                                                                          | <input type="radio"/> yes          |   |   | <input type="radio"/> no |   |   |
| 15. If not, may I ask you why?                                                                                                                                                                                                                                                                                                                 |                                    |   |   |                          |   |   |
| 16. Are you aware of evaporation of hazardous emissions through paints?                                                                                                                                                                                                                                                                        | <input type="radio"/> yes          |   |   | <input type="radio"/> no |   |   |
| 17. How important for you is using solvent-free paints?                                                                                                                                                                                                                                                                                        | 1                                  | 2 | 3 | 4                        | 5 | 6 |
| 18. How important for you is using indoor paints that are not harmful for respiratory tract diseases?                                                                                                                                                                                                                                          | 1                                  | 2 | 3 | 4                        | 5 | 6 |

|                                                                                                                            |                           |                          |                          |
|----------------------------------------------------------------------------------------------------------------------------|---------------------------|--------------------------|--------------------------|
| 19. Have you or a member of your family ever had any complaints to the bad air quality caused through emissions of paints? | <input type="radio"/> yes | <input type="radio"/> no | <input type="radio"/> NS |
|----------------------------------------------------------------------------------------------------------------------------|---------------------------|--------------------------|--------------------------|

### III. Personal Information (optional)

|                                                                                                                                                                                                                         |                                                                     |
|-------------------------------------------------------------------------------------------------------------------------------------------------------------------------------------------------------------------------|---------------------------------------------------------------------|
| <b>Gender:</b> <input type="radio"/> female <input type="radio"/> male <input type="radio"/> NS                                                                                                                         | <b>Zip-code:</b>                                                    |
| <b>Age:</b> <input type="radio"/> <20 <input type="radio"/> 20-35 <input type="radio"/> 36-50 <input type="radio"/> 51-65 <input type="radio"/> >65                                                                     | <b>Children:</b> <input type="radio"/> yes <input type="radio"/> no |
| <b>Level of education:</b> <input type="radio"/> Graduate degree <input type="radio"/> High school degree <input type="radio"/> Professional education <input type="radio"/> University degree <input type="radio"/> NS |                                                                     |
| <b>Are you involved into work with construction products professionally?</b> <input type="radio"/> yes <input type="radio"/> no                                                                                         |                                                                     |
